# Supplementary material for: Combining antioxidant hydrogels with self-assembled microparticles for multifunctional wound dressings
Source: Royal Society of Chemistry journal article supplement (doi:10.1039/c9tb00871c), 2019-01-01
Supplement: c9tb00871c1.pdf [file c9tb00871c1.pdf]

## Supporting information

### Combining antioxidant hydrogels with self-assembled microparticles for multifunctional wound dressings

Mariagrazia di Luca,<sup>†,a,b,c</sup> Manuela Curcio,<sup>†,d</sup> Emanuele Valli,<sup>†,e,f</sup> Giuseppe Cirillo,<sup>\*,d</sup> Florida Voli,<sup>e</sup> Maria Eugenia Butini,<sup>b,c</sup> Annafranca Farfalla,<sup>d</sup> Elvira Pantuso,<sup>d</sup> Antonella Leggio,<sup>d</sup> Fiore Pasquale Nicoletta,<sup>d</sup> Arianna Tavanti,<sup>a</sup> Francesca Iemma<sup>d</sup> and Orazio Vittorio<sup>e,f,g</sup>

<sup>a</sup>. Department of Biology, University of Pisa.

<sup>b</sup>. Charité – Universitätsmedizin Berlin, Corporate Member of Freie Universität Berlin, Humboldt-Universität zu Berlin, and Berlin Institute of Health, Center for Musculoskeletal Surgery, Charitéplatz 1, 10117 Berlin, Germany.

<sup>c</sup>. Berlin-Brandenburg Center for Regenerative Therapies, Charité – Universitätsmedizin Berlin, Augustenburger Platz 1, 13353 Berlin, Germany.

<sup>d</sup>. Department of Pharmacy, Health and Nutritional Sciences, University of Calabria – 87036 – Rende (CS) – Italy.

<sup>e</sup>. Children's Cancer Institute, Lowy Cancer Research Centre, UNSW Sydney, NSW, Australia 2031.

<sup>f</sup>. School of Women's and Children's Health, Faculty of Medicine, UNSW Sydney, NSW, Australia 2052.

<sup>g</sup>. ARC Centre of Excellence for Convergent BioNano Science and Technology, Australian Centre for NanoMedicine, UNSW Sydney, NSW, Australia 2052.

<sup>†</sup> Equal contribution.

\* Corresponding author: Department of Pharmacy, Health and Nutritional Sciences, University of Calabria – 87036 – Rende (CS) – Italy. Tel/Fax 0039 0984493011; E-mail: [giuseppe.cirillo@unical.it](mailto:giuseppe.cirillo@unical.it)

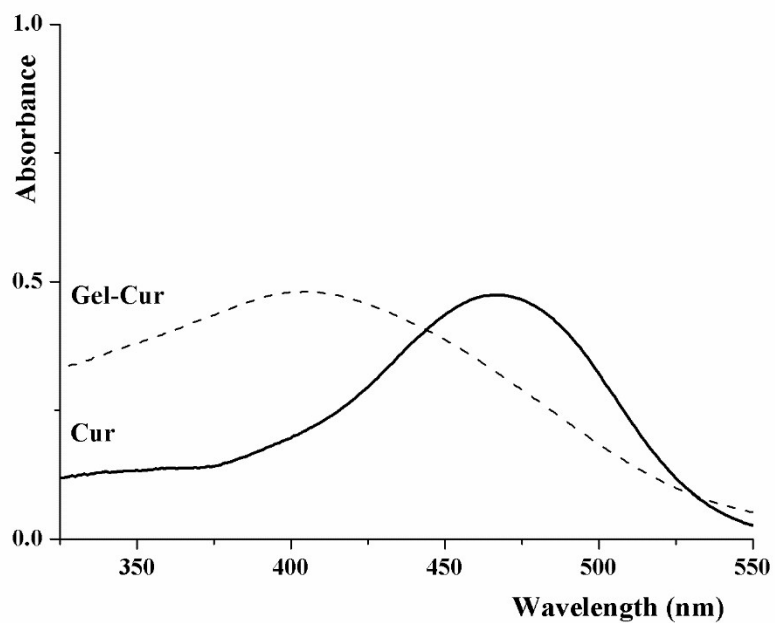

**Fig. S1.** UV-Vis absorption spectra of free and conjugated Cur.

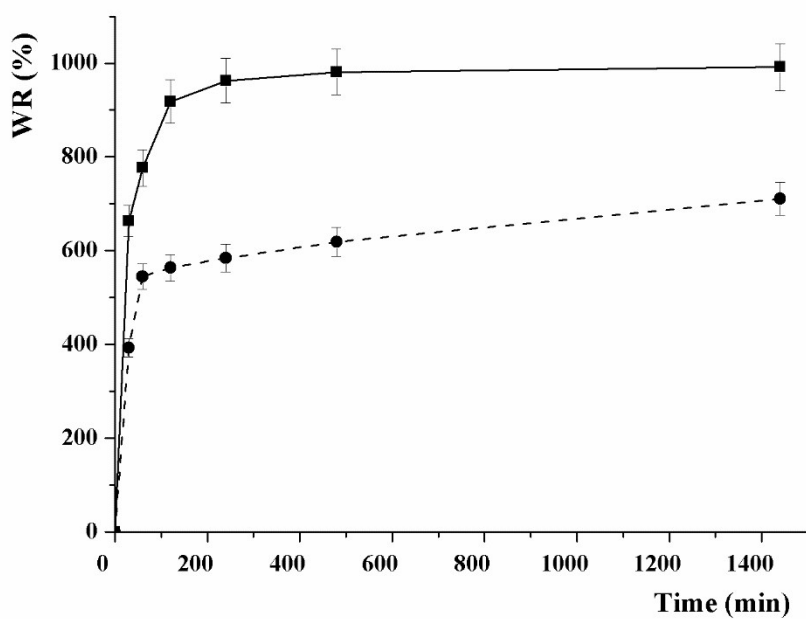

**Fig. S2.** Swelling profiles of HGC (solid line) and HG (dash line) over time.

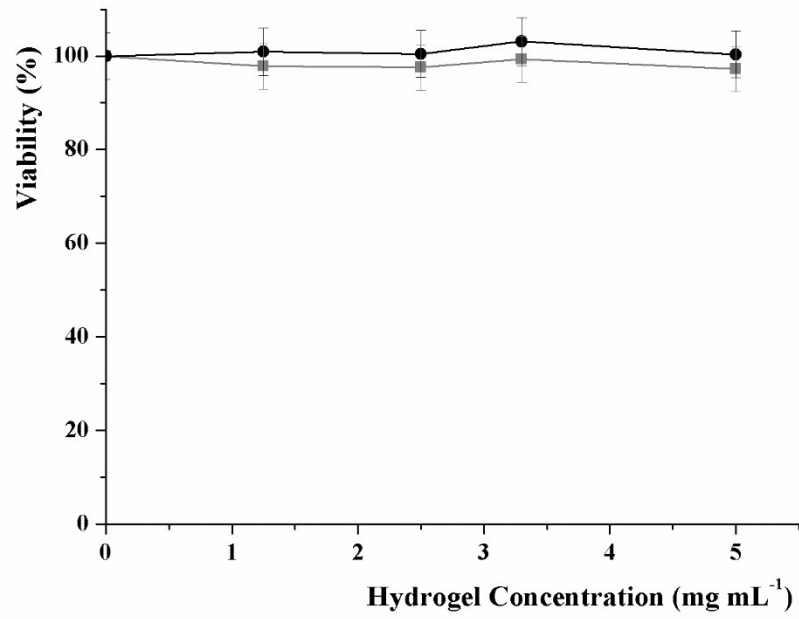

**Fig. S3.** MRC-5 viability after 72 h incubation with pulverized H<sub>G</sub> (■) and H<sub>GC</sub> (●) samples suspended in DMEM + FCS 10%.
